# Supplementary material for: Chestnut polysaccharides restore impaired spermatogenesis by adjusting gut microbiota and the intestinal structure
Source: Royal Society of Chemistry journal article supplement (doi:10.1039/d1fo03145g), 2021-11-29
Supplement: d1fo03145g1.pdf [file d1fo03145g1.pdf]

**Fig. S1** Schematic diagram of experimental design. CPs, Bus, Bus + CPs treated mice, respectively. Collected sample and intestinal content to conduct 16s rRNA sequencing followed by bioinformatic analysis.

**Fig. S2** The bioinformatic analysis of gut microbiota. (A) The species richness in Ctrl, CPs, Bus, and Bus +CPs groups. (B)The microbiota relative abundance at the genus level.

**Fig. S3** The bioinformatic analysis of gut microbiota. (A)The heatmap of dominant bacteria at the phylum level. (B) The figure of random forest classification. (C) The abundance of dominant bacteria at the phylum level.

**Fig. S4** (A) Extended error bar plot showing the functional pathway that had differences between the Ctrl and Bus groups. (B) Extended error bar plot showing the functional pathway that had differences between the Bus and Bus + CPs groups.

**Table S1** Information on the antibodies used in this paper.

| Antibodies           | Vendor            | Dilution |
|----------------------|-------------------|----------|
| HSD17 $\beta$ 1 (IF) | Bioss (bs-6603R)  | 1:150    |
| CYP17A1 (IF)         | Bioss (bs-6695R)  | 1:150    |
| Claudin1 (IF)        | Bioss (bs-1428R)  | 1:500    |
| Zo-1 (IF)            | Bioss (bs-1329R)  | 1:500    |
| Occludin (IF)        | Bioss (bs-10011R) | 1:150    |
| VASA (IF)            | Abcam(ab13840)    | 1:150    |
| Desmoglein2 (IF)     | Abcam (ab150372)  | 1:150    |

**Table S2** Primers used for quantitative RT-PCR.

| Genes        | GenBank     | Forward primer sequences | Reverse primer sequences |
|--------------|-------------|--------------------------|--------------------------|
| <i>Cldn1</i> | NC_000082.7 | CTTGACCCCATCAATGC        | CACCTCCCAGAAGGCAGA       |
| <i>Cldn3</i> | NC_000071.7 | GCAAGCAGACTGTGTGTCGT     | TACCGTCACCACTACCAGCA     |
| <i>Cldn5</i> | NC_000082.7 | ACGGGAGGAGCGCTTTAC       | GTTGGCGAACCAGCAGAG       |
| <i>Pmp22</i> | NC_000077.7 | AGCTGTCCCTTTGAACTGAAAC   | CCCCAACAAGAGTAGGAGCA     |
| <i>Gapdh</i> | NC_000072.7 | ACCACAGTCCATGCCATCAC     | TCCACCACCCTGTTGCTGTA     |
